# Supplementary material for: Integrating Conformational Dynamics and Perturbation-Based Network Modeling for Mutational Profiling of Binding and Allostery in the SARS-CoV-2 Spike Variant Complexes with Antibodies: Balancing Local and Global Determinants of Mutational Escape Mechanisms
Source: MDPI journal article supplement (doi:10.3390/biom12070964), 2022-07-10
Supplement: s1 [file s1]

# Supplementary

## Materials

### **Integrating Conformational Dynamics and Perturbation-Based Network Modeling for Mutational Profiling of Binding and Allostery in the SARS-CoV-2 Spike Variant Complexes with Antibodies: Balancing Local and Global Determinants of Mutational Escape Mechanisms**

Gennady Verkhivker,<sup>1,2\*</sup> Steve Agajanian<sup>1</sup>, Ryan Kassab<sup>1</sup>, Keerthi Krishnan<sup>1</sup>

<sup>1</sup> Keck Center for Science and Engineering, Graduate Program in Computational and Data Sciences, Schmid College of Science and Technology, Chapman University, Orange, CA 92866, United States of America

<sup>2</sup> Department of Biomedical and Pharmaceutical Sciences, Chapman University School of Pharmacy, Irvine, CA 92618, United States of America

\*Correspondence: verkhivk@chapman.edu; Tel.: +1-714-516-4586 (G.V)

Supplemental Materials include scripts for computation of distance fluctuations from MD simulations.
